# Supplementary material for: Lupin Peptide T9 (GQEQSHQDEGVIVR) Modulates the Mutant PCSK9D374Y Pathway: in vitro Characterization of its Dual Hypocholesterolemic Behavior
Source: PubMed Central journal article supplement (PMC6683083; doi:10.3390/nu11071665), 2019-07-20
Supplement: nutrients-11-01665-s001.pdf [file nutrients-11-01665-s001.pdf]

## Brief description of material and methods

### 2. Materials and Methods

#### 2.1. Materials

Dulbecco's modified Eagle's medium (DMEM), stable L-glutamine, fetal bovine serum (FBS), phosphate buffered saline (PBS), penicillin/streptomycin, chemiluminescent reagent, and 96-well plates were purchased from Euroclone (Milan, Italy). HMGC<sub>o</sub>AR assay kit, bovine serum albumin (BSA), RIPA buffer, the antibody against  $\beta$ -actin, monoclonal anti-flag antibody, Janus Green B, formaldehyde, HCl and H<sub>2</sub>SO<sub>4</sub> were from Sigma-Aldrich (St. Louis, MO, USA). The antibody against HMGC<sub>o</sub>AR was bought from Abcam (Cambridge, UK). The antibody against hepatocyte nuclear factor 1 $\alpha$  (HNF-1 $\alpha$ ) was bought from GeneTex (Irvine, CA, USA). The antibodies against SREBP-2, rabbit Ig horseradish peroxidase (HRP), mouse Ig-HRP, phenylmethanesulfonyl fluoride (PMSF), Na-orthovanadate inhibitors were purchased from Santa Cruz Biotechnology Inc. (Santa Cruz, CA, USA); the inhibitor cocktail Complete Midi from Roche (Basel, Switzerland). Mini protean TGX pre-cast gel 7.5% and Mini nitrocellulose Transfer Packs were purchased from BioRad (Hercules, CA, USA). The TMB substrate was bought from Pierce (Rockford, IL, USA). The LDL-DyLight™ 550 was from Cayman Chemical (Ann Arbor, MI, USA). The synthetic peptide T9 was synthesized by the company GeneScript (Piscataway, NJ, USA) at >95% purity. TurboFect Transfection Reagent was from Thermo Scientific (Waltham, MA, USA).

#### 2.2. HMGC<sub>o</sub>AR Activity Assay

The assay buffer, NADPH, substrate solution, and HMGC<sub>o</sub>AR were provided in the HMGC<sub>o</sub>AR Assay Kit (Sigma). The experiments were carried out following the manufacturer's instructions and conditions, which were reported in the Supplementary materials. Briefly, peptide T9 was tested in a concentration range from 10<sup>-5</sup> to 10<sup>-3</sup> M or vehicle (C), at 37 °C. The absorbance at time 0 and 10 min were recorded. The HMGC<sub>o</sub>AR-dependent oxidation of NADPH and the inhibition properties of lupin peptides were measured by the absorbance reduction at 340 nm read by a microplate reader Synergy H1 from Biotek.

#### 2.3. Cell Culture Conditions and Transfection

HepG2 cell line was bought from ATCC (HB-8065, ATCC from LGC Standards, Milan, Italy) and was cultured following the conditions previously described [4]. Detailed information is reported in the Supplementary materials. A total of 3 × 10<sup>4</sup> HepG2 cells/well were seeded in 96-well plates, respectively. The following day, cells at 70–90% of confluence were transfected with the mixture containing 1.0  $\mu$ g pcDNA3+PCSK9<sup>D374Y</sup>-FLAG plasmid and 2.0  $\mu$ L TurboFect Transfection Reagent in 100  $\mu$ L of serum-free DMEM for 48 h. After 24 h, transfected HepG2 cells were treated with peptide T9 (100  $\mu$ M) and incubated for 24 h at 37 °C under 5% CO<sub>2</sub> atmosphere.

#### 2.4. Western Blot Analysis

Transfected HepG2 cells (1.5 × 10<sup>5</sup> cells/well) were treated with 100  $\mu$ M T9 for 24 h. After each treatment, cells were collected and lysated in 30.0  $\mu$ L ice-cold lysis buffer containing: RIPA buffer + inhibitor cocktail + 1:100 PMSF + 1:100 Na-orthovanadate. After centrifugation at 16,060 g for 15 min at 4 °C, the supernatant was recovered and total proteins were quantified by the Bradford method. A total of 50.0  $\mu$ g of total proteins were loaded on a pre-cast 7.5% Sodium Dodecyl Sulphate-Polyacrylamide (SDS-PAGE) gel at 130 V for 45 min. Subsequently, the proteins were transferred to a nitrocellulose membrane (Mini nitrocellulose Transfer Packs,) using a Trans-Blot Turbo at 1.3 A, 25 V for 7 min. Target proteins, on milk blocked membrane, were detected by primary antibodies as follows: rabbit anti-SREBP-2, rabbit anti-LDLR, anti-HMGC<sub>o</sub>AR, anti-HNF1- $\alpha$ , anti-FLAG (for detecting PCSK9<sup>D374Y</sup>), and anti- $\beta$ -actin. Secondary antibodies conjugated with HRP and a chemiluminescent reagent were used to visualize target proteins and their signal was quantified

using the Image Lab Software (Biorad). The internal control  $\beta$ -actin was used to normalize loading variations.

### 2.5. In Cell-Western

Transfected HepG2 cells were treated with or w/o 100  $\mu$ M T9 and vehicle (H<sub>2</sub>O) for 2 h at 37 °C under 5% CO<sub>2</sub> atmosphere. Treated HepG2 cells were fixed in 4% paraformaldehyde for 20 min at room temperature (RT). Cells were washed 5 times with 100  $\mu$ L of PBS/well (each wash was for 5 min at RT) and the endogenous peroxides activity was quenched adding 3% H<sub>2</sub>O<sub>2</sub> in PBS for 20 min at RT. Non-specific sites were blocked with 100  $\mu$ L/well of 5% BSA in PBS for 1.5 h at RT. LDLR primary antibody solution (1:3000 in 5% BSA in PBS, 25  $\mu$ L/well) was incubated O/N at 4 °C. Subsequently, the primary antibody solution was discarded and each sample was washed 5 times with 100  $\mu$ L/well of PBS (each wash was for 5 min at RT). Goat anti-rabbit Ig-HRP secondary antibody solution (1:6000 in 5% BSA in PBS, 50  $\mu$ L/well) was added and incubated 1 h at RT. The secondary antibody solution was washed 5 times with 100  $\mu$ L/well of PBS (each wash for 5 min at RT). Freshly prepared TMB substrate (100  $\mu$ L/well), was added and the plate was incubated at RT until the color was developed. The reaction was then stopped with 2 M H<sub>2</sub>SO<sub>4</sub> and the absorbance at 450 nm was measured using the Synergy H1 fluorescent plate reader from Biotek. Cells were stained by adding 1  $\times$  Janus green stain, incubating for 5 min at RT. The dye was removed and the sample washed 5 times with water. Afterward 0.1 mL 0.5 M HCl per well were added and incubated for 10 min. After 10 s shaking, the OD at 595 nm was measured using the Synergy H1 fluorescent plate reader from Biotek.

### 2.6. Assay for Evaluation of Fluorescent LDL Uptake by HepG2 Cells

After transfection, a total of  $3 \times 10^4$  HepG2 cells/well were seeded in 96-well and treated with 100  $\mu$ M T9 or vehicle (H<sub>2</sub>O) for 24 h. At the end of the treatment period, the culture medium was replaced with 75  $\mu$ L/well LDL-DyLight™ 550 working solution. The cells were additionally incubated for 2 h at 37 °C and then the culture medium was aspirated and replaced with PBS (100  $\mu$ L/well). The degree of LDL uptake was measured using the Synergy H1 fluorescent plate reader from Biotek (excitation and emission wavelengths 540 and 570 nm, respectively).

### 2.7. Statistically analysis

Statistical analyses were carried out by One-way ANOVA (Graphpad Prism 6) followed by Dunnett's test. Values were expressed as means  $\pm$  SD; *P*-values < 0.05 were considered to be significant.

## 3. Results

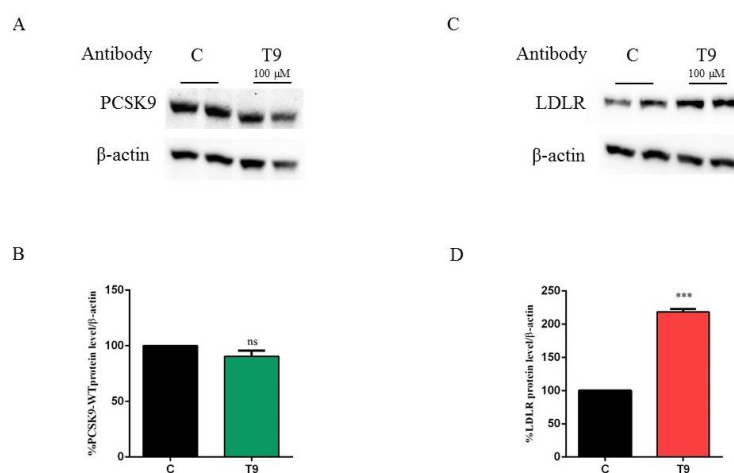

**Figure S1.** Effect of T9 on the PCSK9-WT and LDLR protein level variations. T9 peptide induces increases of LDLR protein level in untransfected cells without affecting the PCSK9 intracellular pathway. (\*\*\*) *p* < 0.0001
